# Supplementary material for: Hydrophilic nanoparticles stabilising mesophase curvature at low concentration but disrupting mesophase order at higher concentrations
Source: Royal Society of Chemistry journal article supplement (doi:10.1039/c6sm00393a), 2016-01-01
Supplement: c6sm00393a1.pdf [file c6sm00393a1.pdf]

## Electronic Supplementary Information (ESI)

### Hydrophilic nanoparticles stabilising mesophase curvature at low Concentration but disrupting mesophase order at higher concentrations

Charlotte M. Beddoes<sup>1,2</sup>, Johanna Berge<sup>1</sup>, Julia E. Bartenstien<sup>1</sup>, Kathrin Lange<sup>1</sup>, Andrew J. Smith<sup>3</sup>,  
Richard K. Heenan<sup>4</sup>, Wuge H. Briscoe<sup>1,\*</sup>

1. School of Chemistry, University of Bristol, Cantock's Close, Bristol BS8 1TS, UK. 2. Bristol Centre for Functional Nanomaterials, Centre for Nanoscience and Quantum Information, Tyndall Avenue, Bristol BS8 1FD, UK. 3. Diamond Light Source, Harwell Science and Innovation Campus, Didcot, Oxfordshire, OX11 0QX, UK. 4. ISIS, Rutherford Labs, Oxfordshire, OX11 0QX, UK.

\*Email: wuge.briscoe@bristol.ac.uk; Ph: +44 (0)117 3318256

#### S1. Example 2D and 1D scattering patterns of the mesophases observed

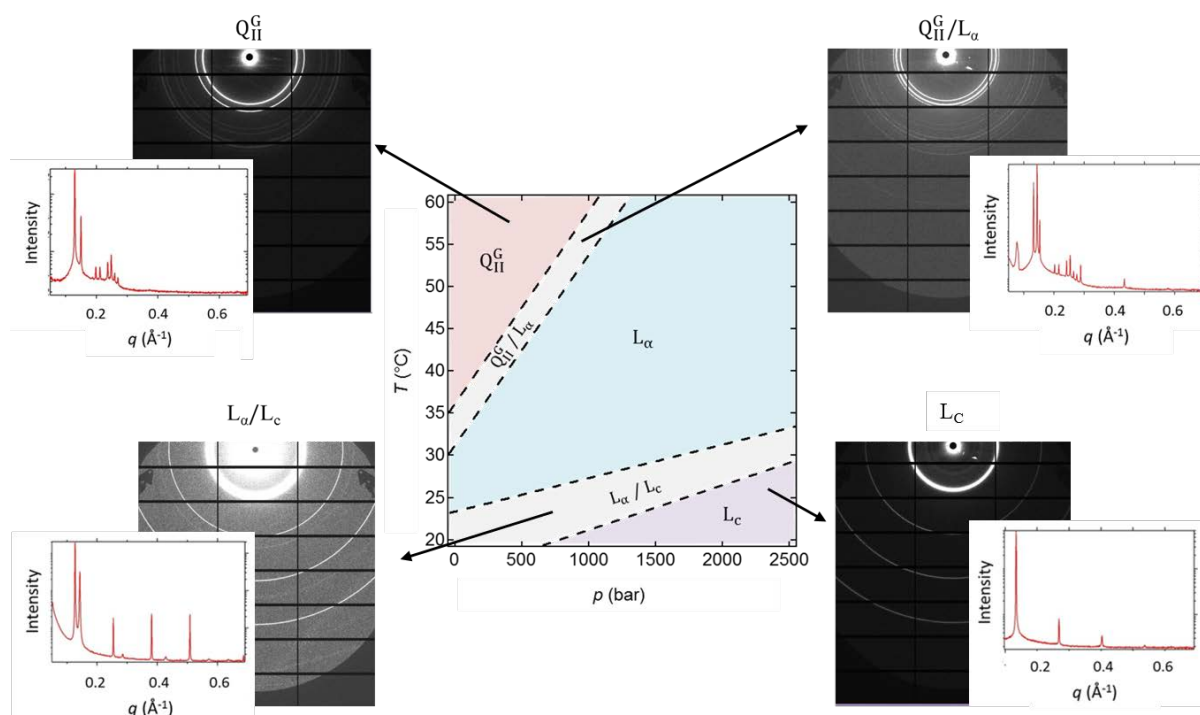

**Figure S1**  $p$ - $T$  phase diagram of MO at 18 wt% hydration without the presence of NPs (Figure 2), with both the 1D scattering pattern and the 2D image of the scans used to identify the mesophases.

## S2. SAXS scans of MO at 18 wt% hydration with 10 nm SiO<sub>2</sub> NPs

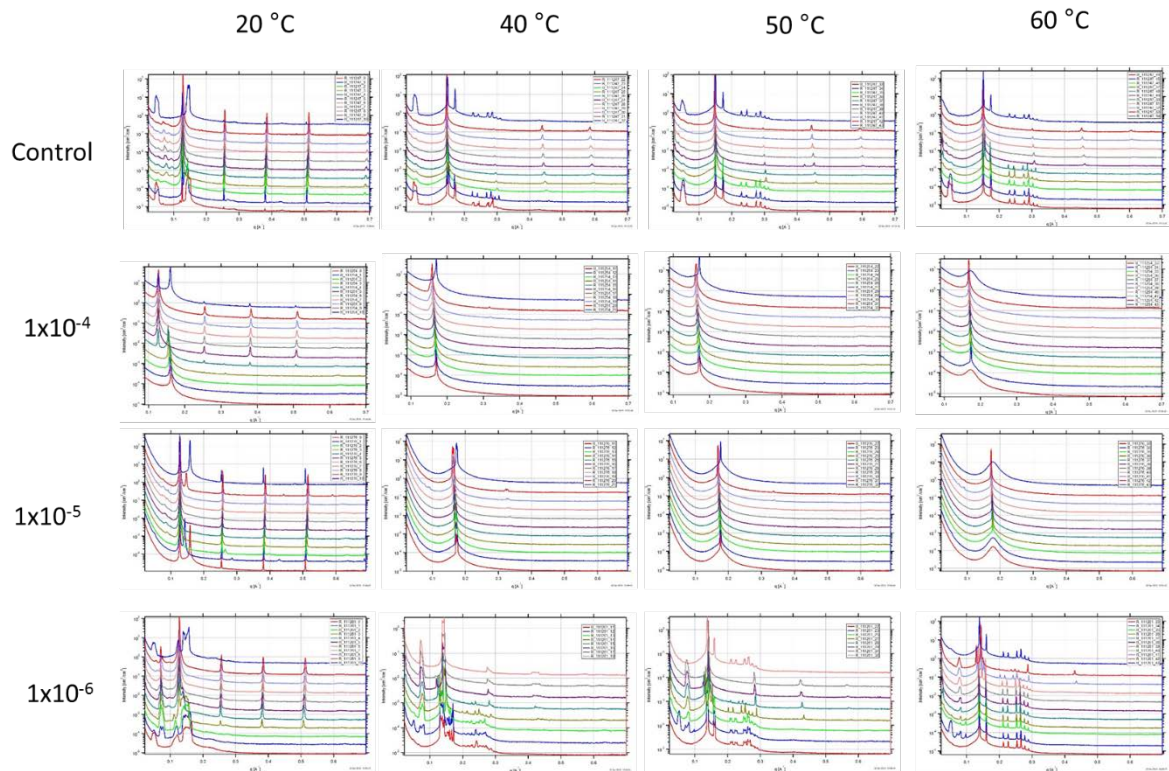

**Figure S2** Complete SAXS scans for the MO mesophase samples without any silica NPs (controls) and in the presence of 10 nm silica NPs at NP/lipid ratios  $\nu$  of  $1 \times 10^{-4}$ ,  $1 \times 10^{-5}$  and  $1 \times 10^{-6}$ . Measurements were made at 20, 40, 50 and 60 °C between 1 -2700 bar at 300 bar intervals. The vertical scale of the curves has been displaced for clarity.

### S3. *d*-spacing vs pressure of MO mesophases

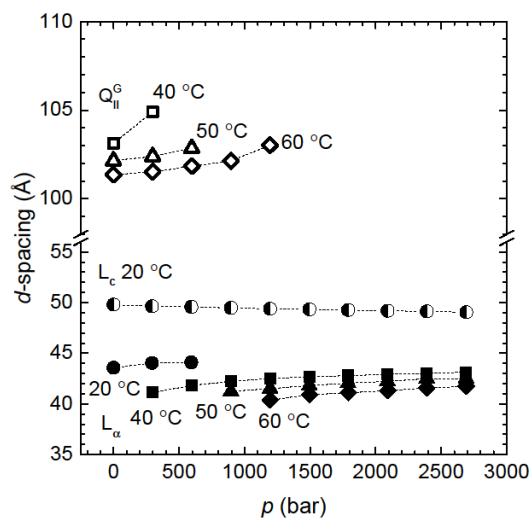

**Figure S3** *d*-spacing vs pressure  $p$  for the MO  $L_{\alpha}$  (filled symbols),  $L_c$  (partially filled circles) and  $Q_{II}^G$  (hollow) mesophases. The *d*-spacing for the lamellar phase is  $\sim$ half of the  $Q_{II}^G$  mesophase.

#### S4. Determining the uncertainty in the $d$ -space value

The  $d$ -spacing ( $d$ ) of the mesophase structure can be determined from  $q$

$$d = \frac{2\pi}{q} \quad (\text{Eqn S1})$$

With  $q$  the only variable, the error or uncertainty in  $d$  ( $\sigma_d$ ) can be determined from  $q$  and the error in  $q$  ( $\sigma_q$ ) as

$$\frac{\sigma_d}{d} = \sqrt{\left(\frac{\sigma_q}{q}\right)^2} \quad (\text{Eqn S2})$$

which can be simplified to

$$\frac{\sigma_d}{d} = \frac{\sigma_q}{q} \quad (\text{Eqn S3})$$

Thus

$$\sigma_d = \frac{\sigma_q \cdot d}{q} \quad (\text{Eqn S4})$$

For example, for the measurements made at 1 bar and 20 °C in an NP free MO sample with  $q$  measurements taken at every 0.0001 Å<sup>-1</sup>, the  $\sigma_d$  for the L<sub>α</sub> and L<sub>c</sub> phases are

$$(L_\alpha) \quad \sigma_d = \frac{0.00005 \cdot 49.795}{0.1262} = 0.02 \text{ \AA}$$

$$(L_c) \quad \sigma_d = \frac{0.00005 \cdot 43.573}{0.1442} = 0.015 \text{ \AA}$$

## S5. Contrast matched SANS scans of MO mesophases containing silica NPs

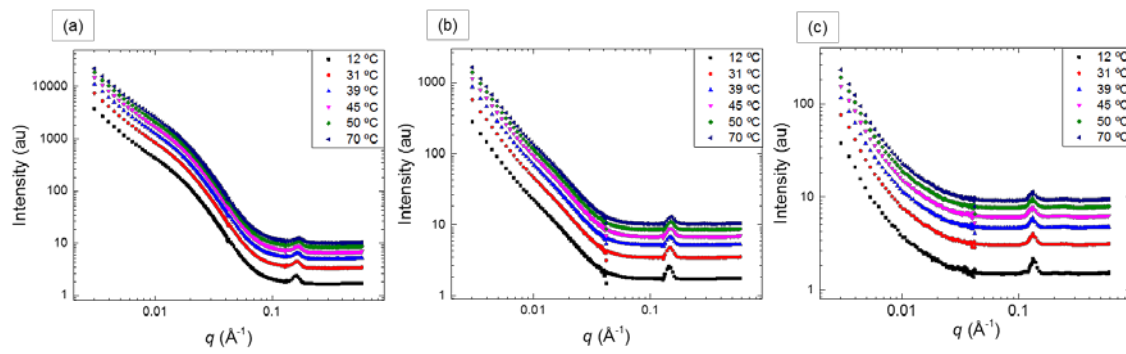

**Figure S4** All contrast matched SANS curves at 12, 31, 39, 45, 50 and 70 °C, at NP/lipid number ratios  $\nu$  of (a)  $1 \times 10^{-4}$ , (b)  $1 \times 10^{-5}$  and (c)  $1 \times 10^{-6}$ . Scans measured for a certain NP/lipid ratio were highly reproducible.

## S6. SEM images of sintered mesophase samples

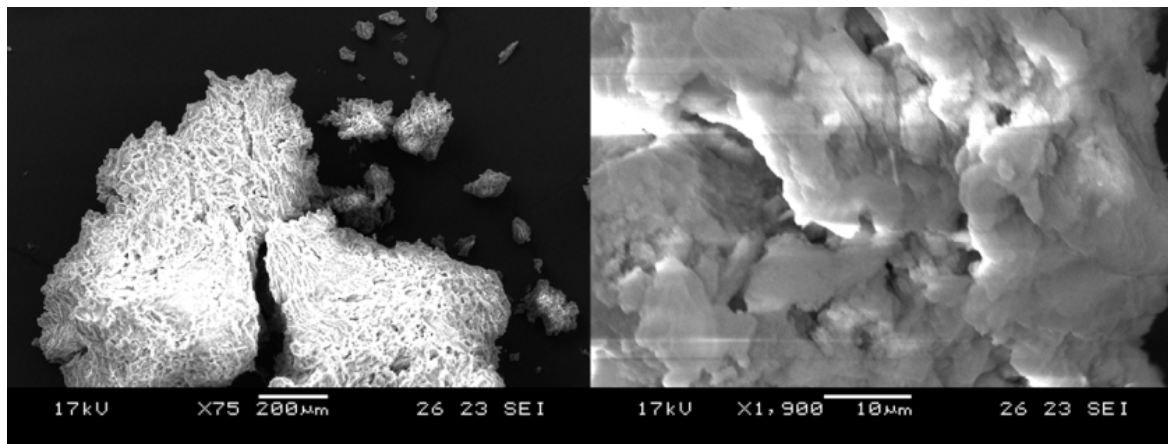

**Figure S5** SEM images of an MO mesophase sample containing NPs at  $v = 1 \times 10^{-4}$  after removing the water and MO by sintering the sample at 600 °C. The remaining silica NPs formed a porous network.
